# Supplementary material for: Synergistic solid–liquid hybrid electrolyte for cycle-stable and high-efficiency Li–CuCl2 batteries
Source: Royal Society of Chemistry journal article supplement (doi:10.1039/d5mh00576k), 2025-01-01
Supplement: d5mh00576k1.pdf [file d5mh00576k1.pdf]

Supplementary Information (SI) for Materials Horizons.  
This journal is © The Royal Society of Chemistry 2025

### **Supporting Information**

## **Synergistic solid-liquid hybrid electrolyte for cycle-stable and high-efficiency**

### **Li-CuCl<sub>2</sub> batteries**

Qianqian Shen,<sup>ab</sup> Yechao Lin,<sup>ab</sup> Hongge Pan,<sup>ac</sup> Mi Yan,<sup>a</sup> Xuan Zhang,<sup>\*ab</sup> Yinzhu Jiang,<sup>\*ab</sup>

a School of Materials Science and Engineering, Zhejiang University, Hangzhou, Zhejiang  
310027, China

b Future Science Research Institute, ZJU-Hangzhou Global Scientific and Technological  
Innovation Center, Zhejiang University, Hangzhou, Zhejiang 311215, China

c Institute of Science and Technology for New Energy, Xi'an Technological University, Xi'an,  
Shanxi 710021, China

\*Corresponding author. E-mail: xuanzhangzju@zju.edu.cn; yzjiang@zju.edu.cn

## 1 Preparation of cathode

2 Copper chloride ( $\text{CuCl}_2$ , Aladdin, 98%) and Ketjenblack (KB, Akzo Nobel, Japan) were used  
3 as received for the preparation of the active powder. The active powder  $\text{CuCl}_2@\text{KB}$  was  
4 obtained by high energy ball milling the raw material  $\text{CuCl}_2$  and KB in a mass ratio of 4:1 for  
5 1 h. All cathodes were made by a traditional slurry-coating method where active powder, KB,  
6 and poly(vinylidene fluoride) (PVDF) binder were ground at a mass ratio of 80:10:10 and then  
7 homogenized in n-methyl-2-pyrrolidone (NMP) at a speed of 3800 rpm in a micro homogenizer  
8 (MSK-SFM-12M) for 9 minutes. The slurry was then bladed on Al foil to render uniform  
9 coating, which was further dried in a vacuum oven at 100 °C for 12 h and the active material  
10 mass loading was around 0.5-1 mg  $\text{cm}^{-2}$ . All cathodes were prepared in a completely dry  
11 environment.

## 12 Preparation of polymer interfacial layer coated solid electrolyte

13  $\text{Li}_{1.5}\text{Al}_{0.5}\text{Ge}_{1.5}(\text{PO}_4)_3$  (LAGP) powder was bought from Hubei Solid New Energy Technology  
14 Co., Ltd and pressed as a pellet, then the pellet was calcined at 900 °C for 8 h with a heating  
15 rate of 5 °C  $\text{min}^{-1}$  to form LAGP pellet. The thickness and packing density of LAGP pellet is  
16 0.95 mm (Fig. S1a) and 3.14 g  $\text{cm}^{-3}$ , respectively. The LAGP is coated by the polymer  
17 interfacial layers. Polymer interfacial layer was prepared by dissolving Poly (vinylidene  
18 fluoride-co-hexafluoropropylene) (PVDF-HFP, Macklin), bis(trifluoromethylsulfonyl)imide  
19 (LiTFSI, Macklin, 99.9%), and Succinonitrile (SN, Sigma-Aldrich, 99%) in N,N-  
20 dimethylformamide (DMF) solvent at a mass ratio of 1:1:0.05 to make a solution. The solid  
21 electrolyte was coated by dropping about 10  $\mu\text{L}$  of solution on one side of LAGP and heating  
22 at 80 °C for 5 h to remove DMF. The thickness of the polymer interfacial layer is 10  $\mu\text{m}$  (Fig.  
23 S1b).

## 1 **Assembly of Li|HE|CuCl<sub>2</sub> and Li|8 M|CuCl<sub>2</sub> cells**

2 The Li|HE|CuCl<sub>2</sub> cells were made with the prepared cathodes, a lithium metal anode, and coated  
3 LAGP electrolyte assembling the 2032 coin-type cells in an argon-filled glovebox (<0.01 ppm  
4 of H<sub>2</sub>O, <0.01 ppm of O<sub>2</sub>). Lithium bis(fluorosulfonyl)imide (LiFSI, Macklin, 99%) and  
5 dimethoxy ethane (DME, Macklin, 99%) were purchased as raw materials to prepare the liquid  
6 electrolyte, which was composed of 8 M LiFSI in DME. 7  $\mu$ L and 2  $\mu$ L of liquid electrolyte (8  
7 M LiFSI in DME) were used to wet the positive and negative side interface, respectively. The  
8 Li|8 M|CuCl<sub>2</sub> cells were assembled with glass fiber (GF/D) as separator and  $\sim$ 180  $\mu$ L liquid  
9 electrolyte was added to assemble the 2025 coin-type cells.

## 10 **Material characterization**

11 Phase structures of the as-prepared materials were investigated by X-ray diffraction (XRD) on  
12 a Bruker D8 diffractometer (equipped with Cu-K $\alpha$  radiation) with a scan range of 10-80 $^\circ$ .  
13 Scanning electron microscopy (SEM, Hitachi S-4800) measurements were employed to  
14 characterize the morphology and microstructure of samples and electrodes. FTIR was recorded  
15 by a NEXUS 670 FTIR instrument. Raman measurements were performed on a Horiba Jobin  
16 Yvon Labram Aramis using a 532 nm diode-pumped solid-state laser. X-ray photoelectron  
17 spectroscopy (XPS) characterization was carried out on a Thermo Scientific Kalpha  
18 spectrometer with mono Al-K $\alpha$  excitation (1486.6 eV). The copper concentrations in the  
19 electrolytes were measured as a function of cycle number *via* ICP-MS (NexION 300X,  
20 PerkinElmer). The Vickers hardness *s* was tested using a microhardness tester (MHVS-50T)

## 21 **Electrochemical measurements**

22 Electrochemical impedance spectroscopy (EIS) tests of the core-cell batteries were performed  
23 on the Autolab electrochemical workstation in a frequency ranging from 1.0 MHz to 0.01 Hz  
24 using an amplitude of 50 mV.

1 Lithium-ion transference number was measured utilizing amperometric technique with an  
 2 applied DC voltage of 10 mV and EIS measurement in a lithium symmetric cell incorporating  
 3 hybrid electrolytes as electrolyte. EIS was tested before and after the DC polarization conducted  
 4 by amperometric technique. The  $t_{Li+}$  value was calculated according to Bruce's equation:  
 5  $t_{Li+} = I_s (\Delta V - I_0 R_0) / (I_0 (\Delta V - I_s R_s))$ , where  $\Delta V$  was the polarization voltage (10 mV),  $I_0$  was the  
 6 initial current,  $I_s$  was the steady state current,  $R_0$  was the initial resistance, and  $R_s$  was the steady  
 7 state total resistance.  
 8 The batteries were charged and discharged between a voltage range of 1.9-4.0 V at 30 °C. The  
 9 specific capacity values and current densities were calculated based on the mass of active  
 10 materials. The galvanostatic intermittent titration technique (GITT) was tested at 20 mA g<sup>-1</sup>,  
 11 with each current pulse lasting 60 minutes, and the resting time was 10 h. The cyclic  
 12 voltammetry (CV) curve was obtained using a CHI660C electrochemical workstation.  
 13

**a**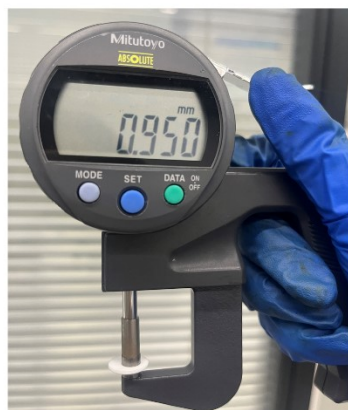**b**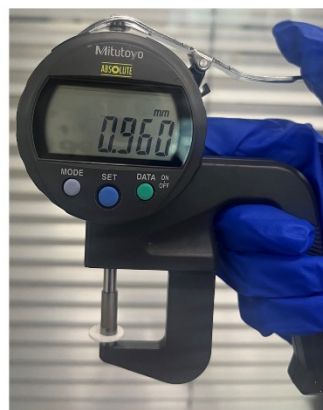

**Fig. S1** The thickness of (a) pristine LAGP and (b) the polymer-coated LAGP.

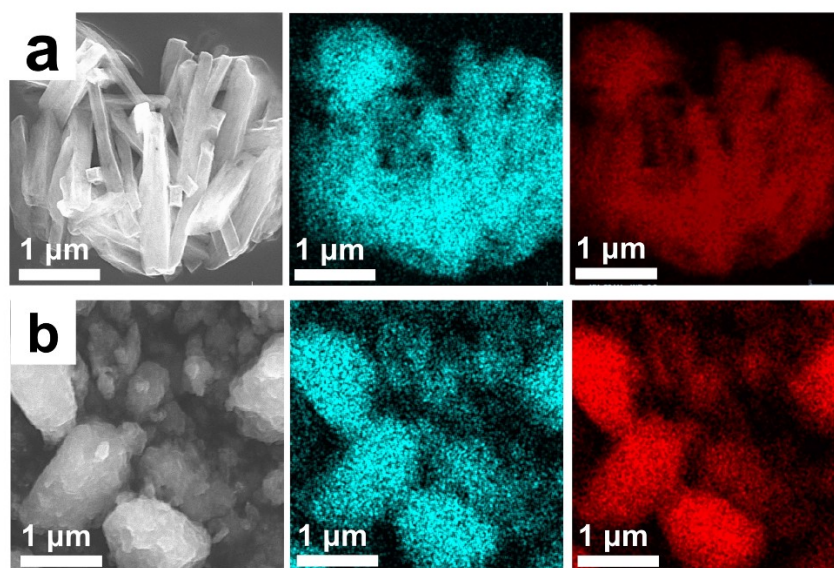

**Fig. S2** SEM and EDS images of (a)  $\text{CuCl}_2$  and (b)  $\text{CuCl}_2@\text{KB}$  mixture.

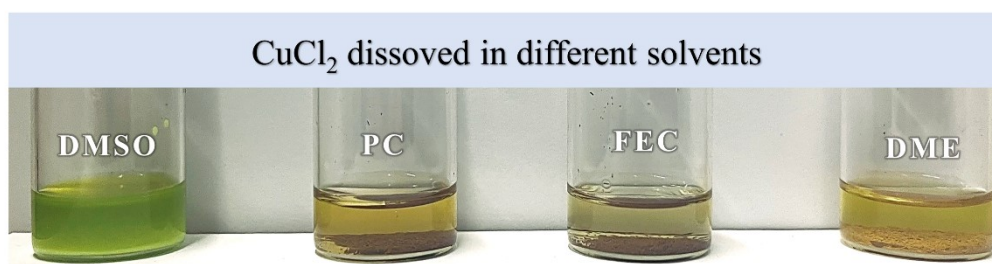

**Fig. S3** Optical images of  $\text{CuCl}_2$  dissolved in various solvents, including dimethyl sulfoxide (DMSO), propylene carbonate (PC), fluoroethylene carbonate (FEC), and dimethoxyethane (DME).

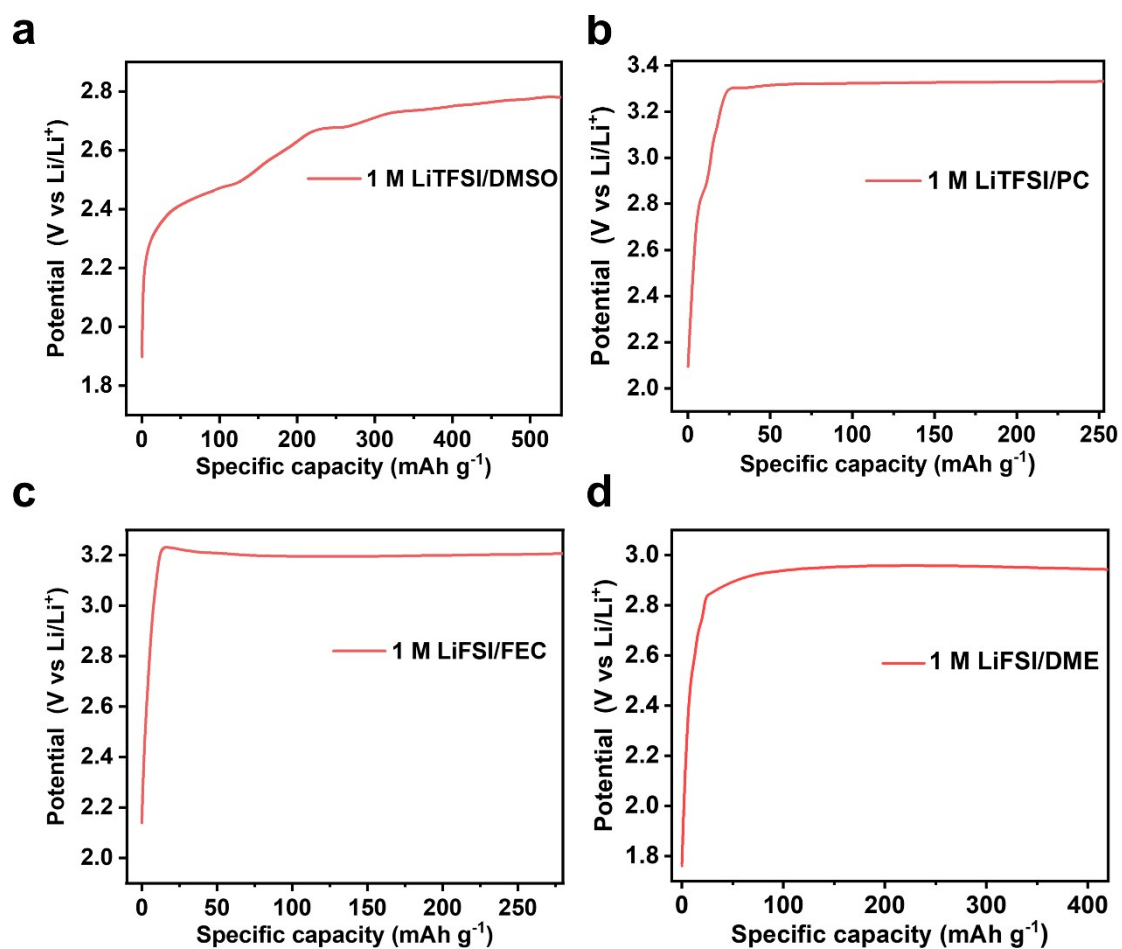

**Fig. S4** Charge-discharge profiles of Li-CuCl<sub>2</sub> batteries with different electrolytes. (a) 1 M LiTFSI in DMSO. (b) 1 M LiTFSI in PC. (c) 1 M LiFSI in FEC. (d) 1 M LiFSI in DME.



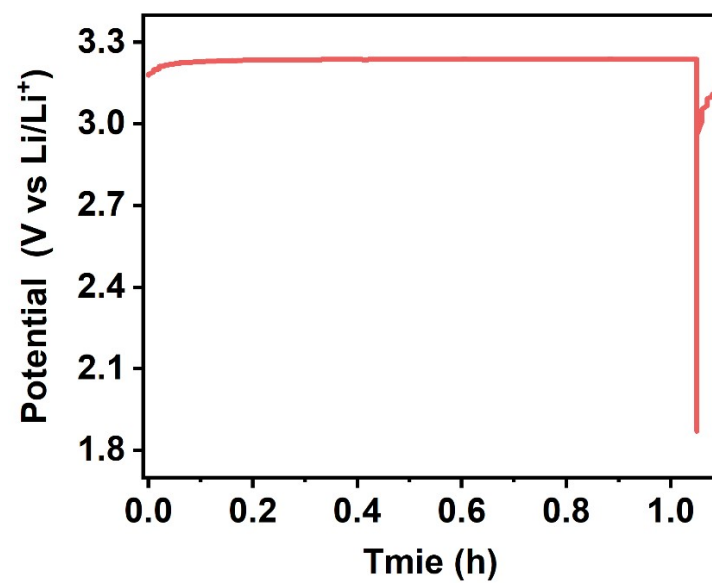

**Fig. S5** Charge-discharge profiles of Li-CuCl<sub>2</sub> cell with LAGP at 0.05 C

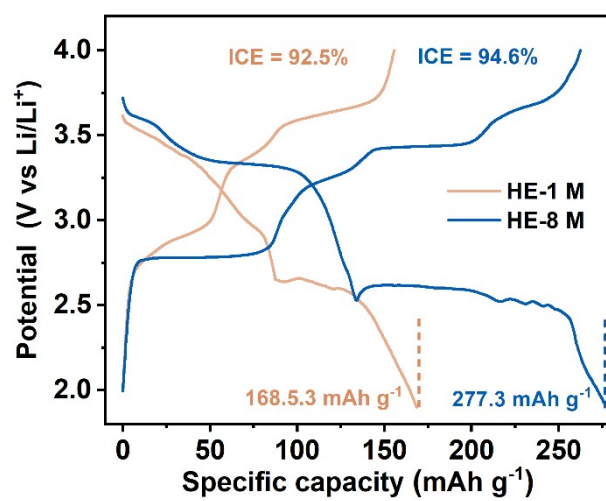

**Fig. S6** Charge-discharge profiles of Li-CuCl<sub>2</sub> cells with 1 M/8 M LiFSI/DME added in hybrid electrolyte at 0.05 C.

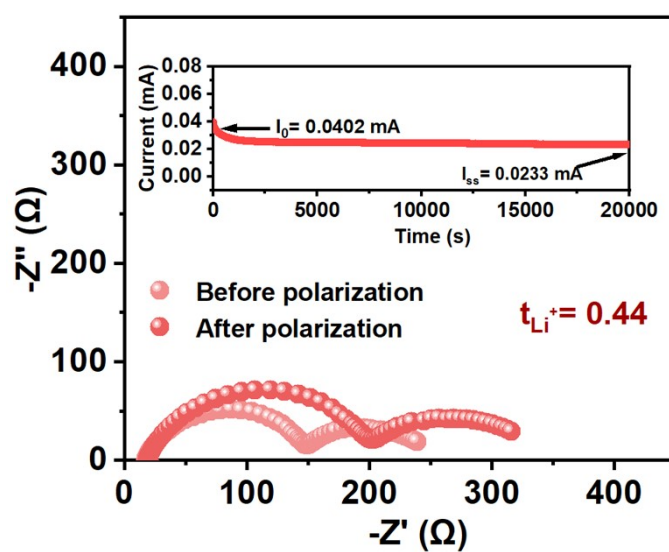

**Fig. S7** Nyquist plots of the Li symmetric cell with 8 M LiFSI/DME before and after polarization (the inset is current-time curve at 10 mV polarization).

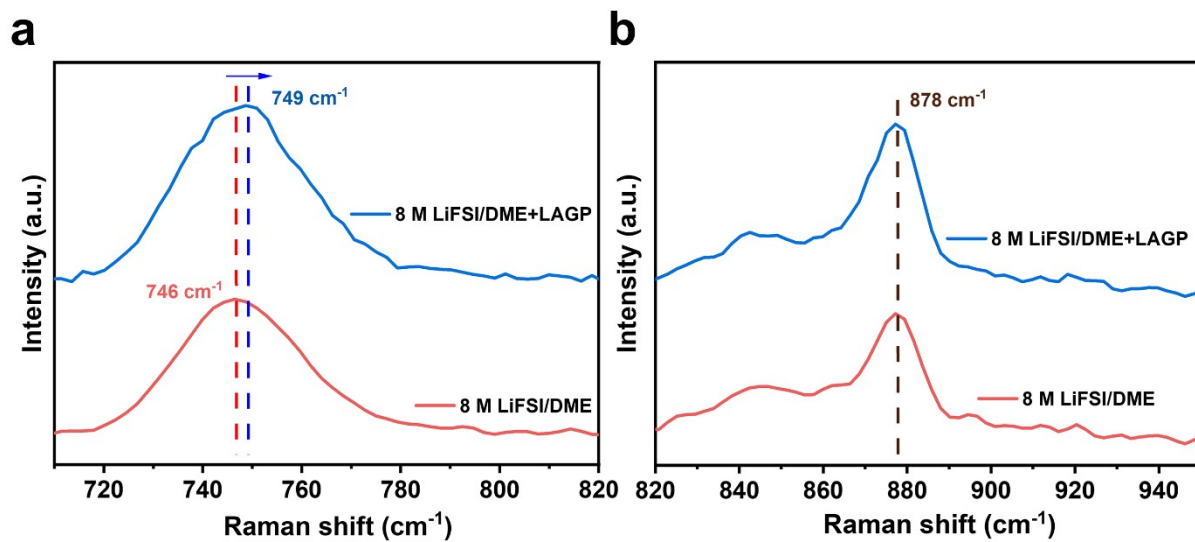

**Fig. S8** Comparative Raman spectra of the characteristic peak of (a) FSI<sup>-</sup> and (b) DME in 8 M LiFSI/DME baseline electrolyte versus LAGP-containing electrolytes.

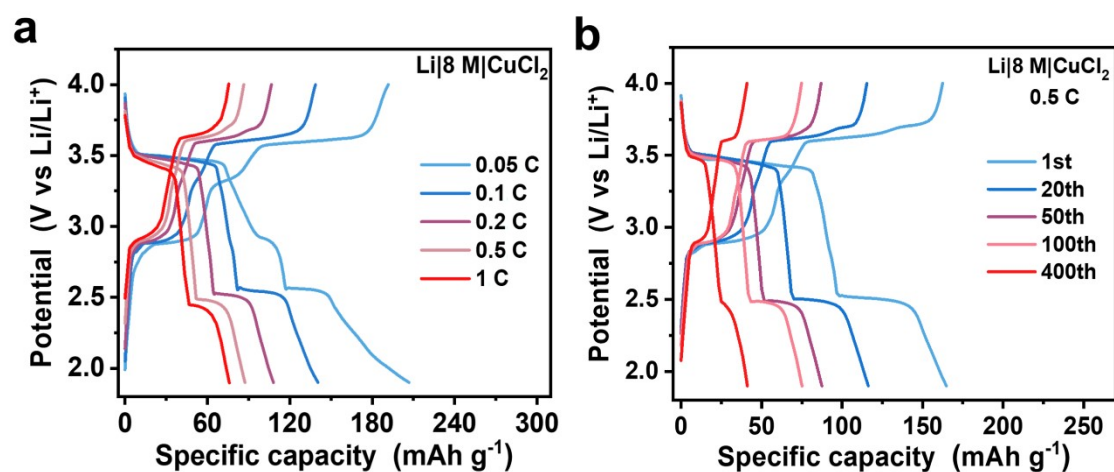

**Fig. S9** (a) Rate performance of Li|8 M|CuCl<sub>2</sub> cell. (b) Charge-discharge curves of the Li|8 M|CuCl<sub>2</sub> cell at different cycling stages at 0.5 C.

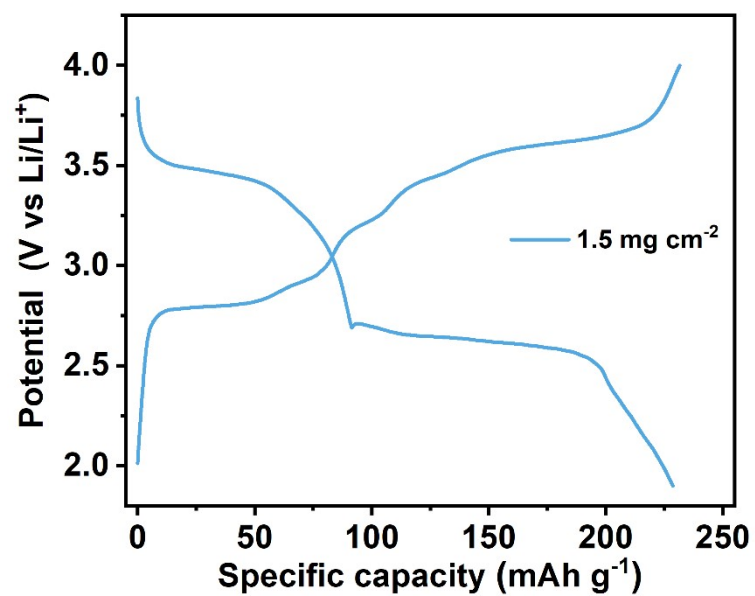

**Fig. S10** Galvanostatic charge-discharge profile of Li|HE|CuCl<sub>2</sub> cell with higher mass loading.

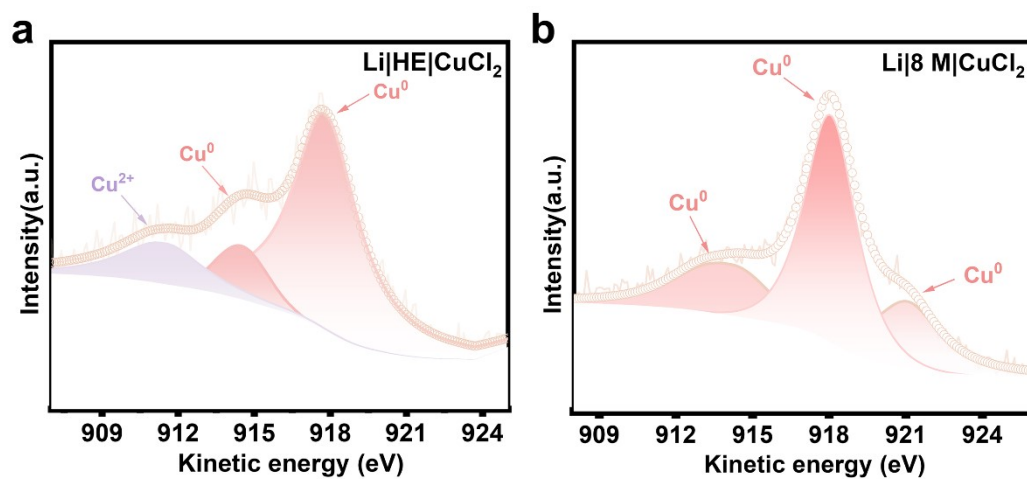

**Fig. S11** Cu LMM XPS Auger spectra of  $\text{CuCl}_2$  cathodes after 100 cycles in (a) HE and (b) 8 M LiFSI/DME system.

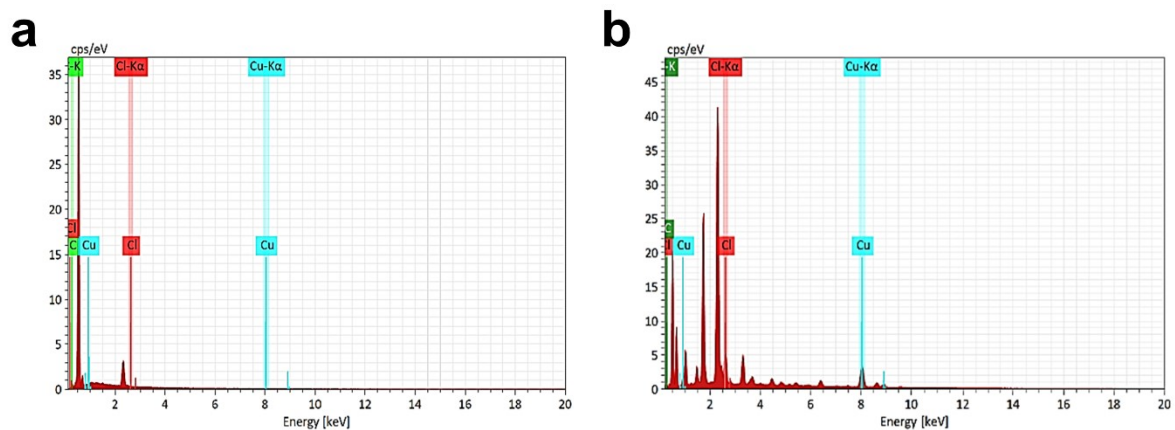

**Fig. S12** EDS spectra of anode after 100 cycles in the Li|HE|CuCl<sub>2</sub> (a) and (b) Li|8 M|CuCl<sub>2</sub> cells.



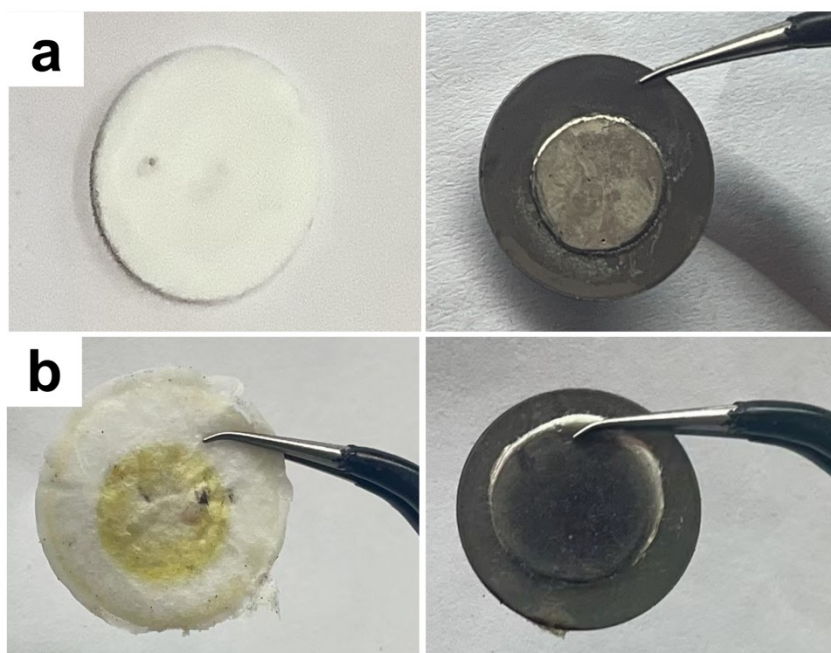

**Fig. S13** Photo patterns of the cycled lithium anode and separator in (a) Li|HE|CuCl<sub>2</sub> and (b) Li|8M|CuCl<sub>2</sub> cells.

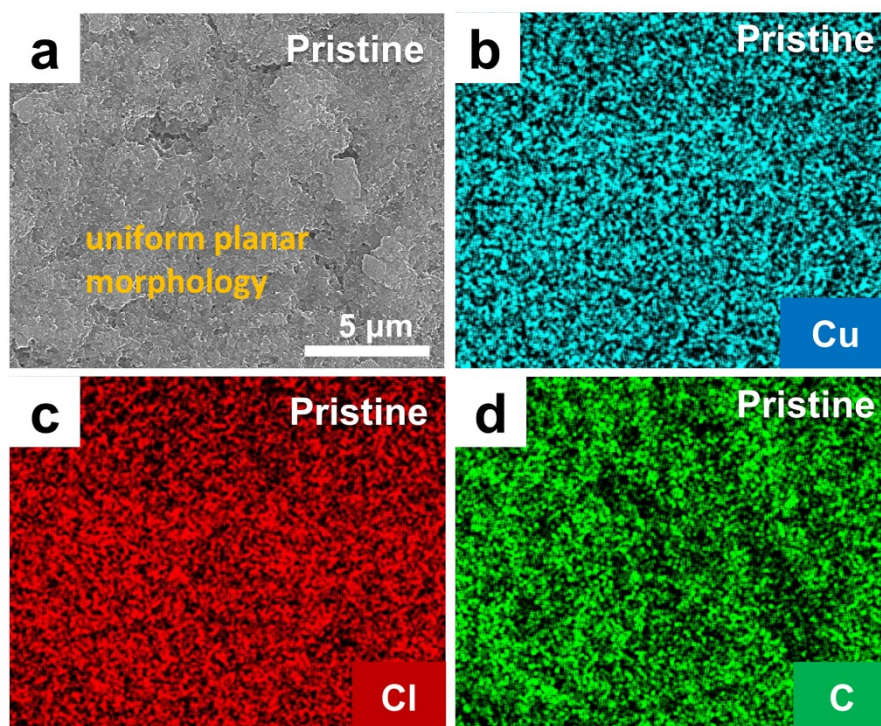

**Fig. S14** The SEM images of the (a) pristine  $\text{CuCl}_2$  cathode and the corresponding EDS mappings of (b) Cu, (c) Cl and (d) C elements.

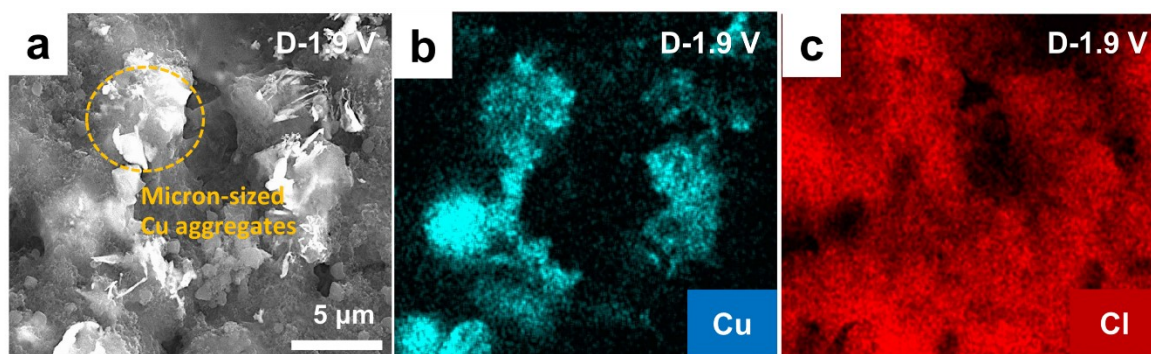

**Fig. S15** The SEM images of the (a) discharged  $\text{CuCl}_2$  cathode and the corresponding EDS mappings of (b) Cu, and (c) Cl elements.

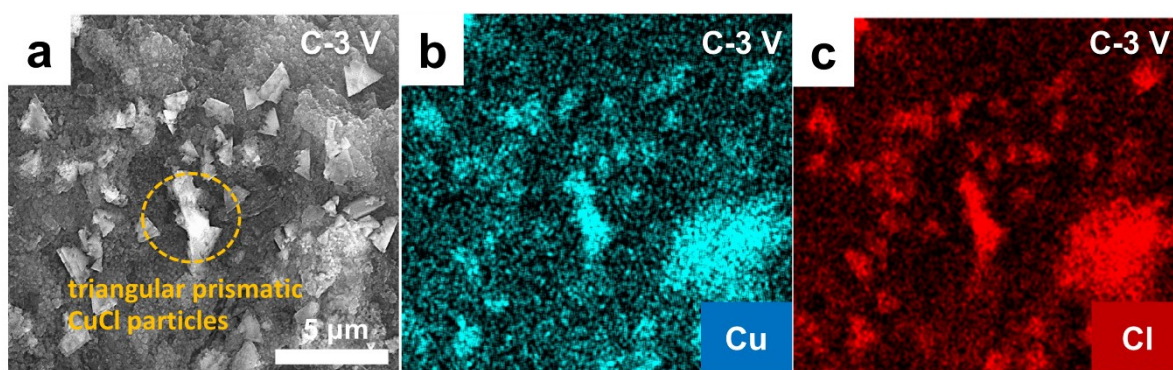

**Fig. S16** The SEM images of the (a) charged  $\text{CuCl}_2$  cathode and the corresponding EDS mappings of (b) Cu and (c) Cl elements.

Table S1. Comparison on the  $\text{Li}^+$  transference number ( $t_{\text{Li}^+}$ ) between this work and some previous studies of hybrid electrolyte.

| System                     | $t_{\text{Li}^+}$ | Reference        |
|----------------------------|-------------------|------------------|
| LATP@SCA-0.25IL            | 0.40              | 1                |
| LAGP@IL                    | 0.53              | 2                |
| t-CSE1                     | 0.69              | 3                |
| LAGP/SN                    | 0.77              | 4                |
| SLFE-5%LAGP                | 0.64              | 5                |
| LATP@PVDF-co-HFP-LiTFSA/SL | 0.64              | 6                |
| <b>LAGP-8 M LiFS/DME</b>   | <b>0.86</b>       | <b>This work</b> |

Table S2. Vickers Harness of CuCl<sub>2</sub> and LAGP.

| Sample            | Vickers Harness (Gpa) |
|-------------------|-----------------------|
| CuCl <sub>2</sub> | 0.18                  |
| LAGP              | 8.03                  |

## Supplementary references

1. Y. Wu, M. Chao, C. Lu, H. Xu, K. Zeng, D. Li and R. Yang, *Journal of Power Sources*, 2024, **599**, 234206.
2. B. Yan, Y. Qu, H. Ren, X. Lu, Z. Wang, W. Liu, Y. Wang, M. Kotobuki and K. Jiang, *Materials Chemistry and Physics*, 2022, **287**, 126265.
3. D. Y. Kibret, T. H. Mengesha, K. Z. Walle, Y.-S. Wu, J.-K. Chang, R. Jose and C.-C. Yang, *Journal of Energy Storage*, 2024, **94**, 112523.
4. W. Zha, W. Li, Y. Ruan, J. Wang and Z. Wen, *Energy Storage Materials*, 2021, **36**, 171-178.
5. M. Song, C. Tian, T. Huang and A. J. A. A. E. M. Yu, 2023, **6**, 7681-7691.
6. J.-y. Ock, M. Fujishiro, K. Ueno, I. Kawamura, R. Tatara, K. Hashimoto, M. Watanabe and K. Dokko, *ACS omega*, 2021, **6**, 16187-16193.
